# Supplementary material for: Pilot study of implementing Managing and Adapting Practice in a German psychotherapy master’s program
Source: PubMed Central journal article supplement (PMC11252301; doi:10.1038/s41598-024-67407-w), 2024-07-16
Supplement: 41598_2024_67407_MOESM1_ESM.pdf [file 41598_2024_67407_MOESM1_ESM.pdf]

**Supplemental material 1. Items and translations of all scales**

**Table S1. Perceived Characteristics of Intervention Scale (PCIS, Cook et al., 2015)**

| <b>Original</b>                                                                              | <b>German translation</b>                                                                                        |
|----------------------------------------------------------------------------------------------|------------------------------------------------------------------------------------------------------------------|
| 1. [The treatment] is more effective than other therapies I have used.                       | 1. [Die Behandlung] ist wirksamer als andere Therapien, die ich angewendet habe.                                 |
| 2. [The treatment] is more convenient than other therapies I have used.                      | 2. [Die Behandlung] ist bequemer als andere Therapien, die ich angewendet habe.                                  |
| 3. Using [the treatment] fits well with the way I like to work.                              | 3. Die Anwendung von [der Behandlung] passt gut zu meiner Art zu arbeiten.                                       |
| 4. [The treatment] is aligned with my clinical judgment.                                     | 4. [Die Behandlung] stimmt mit meinem klinischen Urteil überein.                                                 |
| 5. [The treatment] is clear and understandable.                                              | 5. [Die Behandlung] ist klar und verständlich.                                                                   |
| 6. [The treatment] is easy to use.                                                           | 6. [Die Behandlung] ist einfach zu handhaben.                                                                    |
| 7. [The treatment] can be tested out with patients without disrupting their overall therapy. | 7. [Die Behandlung] kann mit Patient:innen ausprobiert werden, ohne ihre Behandlung im Gesamten zu unterbrechen. |
| 8. It is easy to try out [the treatment] and see how it performs.                            | 8. Es ist einfach, [die Behandlung] auszuprobieren und zu sehen, wie sie wirkt.                                  |
| 9. It is easy to tell whether patients are benefitting from [the treatment].                 | 9. Es ist leicht zu erkennen, ob die Patient:innen von [der Behandlung] profitieren.                             |
| 10. [The treatment] produces improvements in my patients that I can actually see.            | 10. [Die Behandlung] führt zu Verbesserungen bei meinen Patient:innen, die ich tatsächlich beobachten kann.      |
| 11. [The treatment] can be adapted to fit my treatment setting.                              | 11. [Die Behandlung] kann an mein Behandlungssetting angepasst werden.                                           |
| 12. [The treatment] can be adapted to meet the needs of my patients.                         | 12. [Die Behandlung] kann an die Bedürfnisse meiner Patient:innen angepasst werden.                              |
| 13. Using [the treatment] improves the quality of work that I do.                            | 13. Die Anwendung [der Behandlung] verbessert die Qualität meiner Arbeit.                                        |
| 14. Using [the treatment] makes it easier to do my job.                                      | 14. Die Anwendung [der Behandlung] erleichtert mir meine Arbeit.                                                 |
| 15. The knowledge required to learn [the treatment] can be effectively taught.               | 15. Das Wissen, das zum Erlernen [des Verfahrens] erforderlich ist, kann effektiv vermittelt werden.             |
| 16. The skills required to implement [the treatment] can be effectively taught.              | 16. Die für die Durchführung [des Verfahrens] erforderlichen Fähigkeiten können wirksam vermittelt werden.       |
| 17. [The treatment] manual is helpful.                                                       | 17. Das Handbuch [der Behandlung] ist hilfreich.                                                                 |
| 18. [The treatment] has helpful supportive materials for patients.                           | 18. [Die Behandlung] hat hilfreiche Materialien zur Unterstützung der Patient:innen.                             |

Szota, K., van der Meer, A. S., Bourdeau, T., Chorpita, B. F., Chavanon, M.-L., & Christiansen, H. Pilot study of implementing Managing and Adapting Practice in a German psychotherapy master's program. *Scientific Reports*.

**Table S2. Global assessments on confidence to use EBP**

| <b>Original (German)</b>                                                  | <b>English translation</b>                          |
|---------------------------------------------------------------------------|-----------------------------------------------------|
| 1. Wie beurteilen Sie Ihre Kompetenzen zu EBP?                            | 1. How would you rate your competencies in EBP?     |
| 2. Wie beurteilen Sie Ihre Kenntnisse zu EBP?                             | 2. How would you rate your knowledge of EBP?        |
| 3. Wie beurteilen Sie Ihre Fähigkeiten zum Einsatz von EBP?               | 3. How would you rate your ability to use EBP?      |
| 4. In welchem Ausmaß fühlen Sie sich für den Einsatz von EBP vorbereitet? | 4. To what extent do you feel prepared to use EBP?  |
| 5. In welchem Ausmaß fühlen Sie sich für den Einsatz von EBP bereit?      | 5. To what extent do you feel ready to use EBP?     |
| 6. In welchem Ausmaß trauen Sie sich den Einsatz von EBP zu?              | 6. To what extent do you feel confident to use EBP? |
